# Supplementary material for: Mucosal Responses to Zika Virus Infection in Cynomolgus Macaques
Source: MDPI journal article supplement (doi:10.3390/pathogens11091033), 2022-09-12
Supplement: s1 [file s1]

**Table S1.** Mucosal cytokine responses to *in vivo* ZIKV exposure<sup>1</sup>.

Tissue: Colorectal

| ZIKV challenge       | Cytokine      | Virus vs. Ctrl FC | P value |
|----------------------|---------------|-------------------|---------|
| Subcutaneous         | GM-CSF        | 0.399             | 0.27370 |
|                      | IFN- $\gamma$ | 0.567             | 0.35040 |
|                      | IL-2          | 0.920             | 0.79758 |
|                      | IL-15         | 0.746             | 0.47389 |
|                      | IL-17         | 0.592             | 0.12627 |
|                      | IL-1ra        | 0.485             | 0.14821 |
|                      | IL-1 $\beta$  | 0.602             | 0.14109 |
|                      | IL-5          | 0.717             | 0.53290 |
|                      | IL-6          | 0.458             | 0.08282 |
|                      | IL-8          | 0.329             | 0.12518 |
|                      | MCP-1         | 0.958             | 0.90168 |
|                      | MIP-1 $\beta$ | 0.453             | 0.09285 |
|                      | VEGF-A        | 0.250             | 0.02942 |
|                      | IL-4          | 0.623             | 0.28134 |
|                      | IL-10         | 0.551             | 0.13676 |
| Vaginal              | GM-CSF        | 2.153             | 0.10653 |
|                      | IFN- $\gamma$ | 2.552             | 0.07918 |
|                      | IL-2          | 4.105             | 0.00020 |
|                      | IL-15         | 0.561             | 0.07125 |
|                      | IL-17         | 3.174             | 0.04847 |
|                      | IL-1ra        | 8.672             | 0.11380 |
|                      | IL-1 $\beta$  | 2.394             | 0.27339 |
|                      | IL-5          | 0.599             | 0.12514 |
|                      | IL-6          | 3.416             | 0.14327 |
|                      | IL-8          | 0.893             | 0.85175 |
|                      | MCP-1         | 2.268             | 0.15493 |
|                      | MIP-1 $\beta$ | 31.518            | 0.00000 |
|                      | VEGF-A        | 1.828             | 0.00440 |
|                      | IL-4          | 0.447             | 0.02512 |
|                      | IL-10         | 0.042             | 0.00105 |
| Vaginal (uninfected) | GM-CSF        | 0.455             | 0.30850 |
|                      | IFN- $\gamma$ | 1.112             | 0.78718 |
|                      | IL-2          | 2.164             | 0.18709 |
|                      | IL-15         | 0.292             | 0.13345 |
|                      | IL-17         | 1.826             | 0.06051 |
|                      | IL-1ra        | 4.234             | 0.09048 |
|                      | IL-1 $\beta$  | 2.033             | 0.03494 |
|                      | IL-5          | 0.567             | 0.32682 |
|                      | IL-6          | 0.778             | 0.26842 |
|                      | IL-8          | 0.277             | 0.12048 |
|                      | MCP-1         | 1.393             | 0.04997 |
|                      | MIP-1 $\beta$ | 30.271            | 0.00007 |
|                      | VEGF-A        | 0.654             | 0.35544 |
|                      | IL-4          | 0.398             | 0.14498 |
|                      | IL-10         | 0.007             | 0.03107 |

Tissue: Vaginal

| ZIKV challenge       | Cytokine      | Virus vs. Ctrl FC | P value |
|----------------------|---------------|-------------------|---------|
| Subcutaneous         | GM-CSF        | 1.482             | 0.74853 |
|                      | IFN- $\gamma$ | 1.121             | 0.30044 |
|                      | IL-2          | 1.044             | 0.81526 |
|                      | IL-15         | 1.538             | 0.50217 |
|                      | IL-17         | 1.065             | 0.91412 |
|                      | IL-1ra        | 1.640             | 0.68273 |
|                      | IL-1 $\beta$  | 3.377             | 0.05465 |
|                      | IL-5          | 0.807             | 0.25777 |
|                      | IL-6          | 0.970             | 0.48965 |
|                      | IL-8          | 0.755             | 0.63778 |
|                      | MCP-1         | 1.167             | 0.57235 |
|                      | MIP-1 $\beta$ | 0.750             | 0.69413 |
|                      | VEGF-A        | 0.220             | 0.47318 |
|                      | IL-4          | 0.845             | 0.28484 |
|                      | IL-10         | 1.249             | 0.82541 |
| Vaginal              | GM-CSF        | 2.009             | 0.18285 |
|                      | IFN- $\gamma$ | 6.512             | 0.00007 |
|                      | IL-2          | 4.127             | 0.00043 |
|                      | IL-15         | 0.626             | 0.09253 |
|                      | IL-17         | 3.784             | 0.00091 |
|                      | IL-1ra        | 18.721            | 0.00007 |
|                      | IL-1 $\beta$  | 24.585            | 0.27703 |
|                      | IL-5          | 2.422             | 0.00002 |
|                      | IL-6          | 5.206             | 0.00078 |
|                      | IL-8          | 1.320             | 0.18684 |
|                      | MCP-1         | 2.861             | 0.00003 |
|                      | MIP-1 $\beta$ | 112.680           | 0.00005 |
|                      | VEGF-A        | 3.485             | 0.02610 |
|                      | IL-4          | 1.510             | 0.00146 |
|                      | IL-10         | 0.193             | 0.03617 |
| Vaginal (uninfected) | GM-CSF        | 1.794             | 0.23480 |
|                      | IFN- $\gamma$ | 6.473             | 0.00514 |
|                      | IL-2          | 3.694             | 0.00533 |
|                      | IL-15         | 0.676             | 0.35121 |
|                      | IL-17         | 3.728             | 0.02685 |
|                      | IL-1ra        | 11.619            | 0.00783 |
|                      | IL-1 $\beta$  | 3.600             | 0.03136 |
|                      | IL-5          | 2.406             | 0.00473 |
|                      | IL-6          | 4.501             | 0.00876 |
|                      | IL-8          | 0.806             | 0.19529 |
|                      | MCP-1         | 2.956             | 0.00164 |
|                      | MIP-1 $\beta$ | 104.719           | 0.00003 |
|                      | VEGF-A        | 5.728             | 0.03413 |
|                      | IL-4          | 1.515             | 0.03931 |
|                      | IL-10         | 0.051             | 0.15515 |

Tissue: Cervical

| ZIKV challenge       | Cytokine      | Virus vs. Ctrl FC | P value |
|----------------------|---------------|-------------------|---------|
| Subcutaneous         | GM-CSF        | 0.340             | 0.46252 |
|                      | IFN- $\gamma$ | 1.253             | 0.30113 |
|                      | IL-2          | 0.731             | 0.56755 |
|                      | IL-15         | 1.019             | 0.90289 |
|                      | IL-17         | 1.159             | 0.22049 |
|                      | IL-1ra        | 0.123             | 0.40006 |
|                      | IL-1 $\beta$  | 0.550             | 0.25703 |
|                      | IL-5          | 1.186             | 0.79136 |
|                      | IL-6          | 0.550             | 0.33238 |
|                      | IL-8          | 0.995             | 0.98248 |
|                      | MCP-1         | 0.875             | 0.66782 |
|                      | MIP-1 $\beta$ | 0.691             | 0.56985 |
|                      | VEGF-A        | 0.514             | 0.55342 |
|                      | IL-4          | 0.872             | 0.42893 |
|                      | IL-10         | 1.029             | 0.84283 |
| Vaginal              | GM-CSF        | 1.592             | 0.50718 |
|                      | IFN- $\gamma$ | 5.878             | 0.00318 |
|                      | IL-2          | 4.363             | 0.00018 |
|                      | IL-15         | 0.481             | 0.01078 |
|                      | IL-17         | 7.056             | 0.00068 |
|                      | IL-1ra        | 11.055            | 0.25676 |
|                      | IL-1 $\beta$  | 8.091             | 0.04854 |
|                      | IL-5          | 0.851             | 0.32088 |
|                      | IL-6          | 4.981             | 0.03989 |
|                      | IL-8          | 1.872             | 0.10807 |
|                      | MCP-1         | 0.681             | 0.60266 |
|                      | MIP-1 $\beta$ | 99.358            | 0.00000 |
|                      | VEGF-A        | 13.455            | 0.00581 |
|                      | IL-4          | 0.878             | 0.07949 |
|                      | IL-10         | 0.028             | 0.00000 |
| Vaginal (uninfected) | GM-CSF        | 1.311             | 0.71198 |
|                      | IFN- $\gamma$ | 5.213             | 0.00469 |
|                      | IL-2          | 3.431             | 0.03065 |
|                      | IL-15         | 0.564             | 0.10973 |
|                      | IL-17         | 5.894             | 0.01212 |
|                      | IL-1ra        | 0.963             | 0.96867 |
|                      | IL-1 $\beta$  | 2.029             | 0.05683 |
|                      | IL-5          | 0.984             | 0.94621 |
|                      | IL-6          | 4.819             | 0.00002 |
|                      | IL-8          | 1.904             | 0.06719 |
|                      | MCP-1         | 2.080             | 0.04487 |
|                      | MIP-1 $\beta$ | 99.018            | 0.00004 |
|                      | VEGF-A        | 26.030            | 0.00438 |
|                      | IL-4          | 0.908             | 0.37807 |
|                      | IL-10         | 0.025             | 0.00025 |

Tissue: Uterine

| ZIKV challenge       | Cytokine      | Virus vs. Ctrl FC | P value |
|----------------------|---------------|-------------------|---------|
| Subcutaneous         | GM-CSF        | 0.987             | 0.98917 |
|                      | IFN- $\gamma$ | 1.215             | 0.29025 |
|                      | IL-2          | 1.073             | 0.56398 |
|                      | IL-15         | 0.635             | 0.17422 |
|                      | IL-17         | 0.989             | 0.92840 |
|                      | IL-1ra        | 1.109             | 0.87560 |
|                      | IL-1 $\beta$  | 1.143             | 0.75709 |
|                      | IL-5          | 0.644             | 0.58610 |
|                      | IL-6          | 0.939             | 0.47107 |
|                      | IL-8          | 1.322             | 0.73311 |
|                      | MCP-1         | 1.222             | 0.55883 |
|                      | MIP-1 $\beta$ | 0.838             | 0.58586 |
|                      | VEGF-A        | 7.464             | 0.42031 |
|                      | IL-4          | 0.967             | 0.39898 |
|                      | IL-10         | 0.893             | 0.84500 |
| Vaginal              | GM-CSF        | 6.432             | 0.03138 |
|                      | IFN- $\gamma$ | 7.991             | 0.00000 |
|                      | IL-2          | 5.043             | 0.00001 |
|                      | IL-15         | 0.447             | 0.00789 |
|                      | IL-17         | 6.984             | 0.00006 |
|                      | IL-1ra        | 41.707            | 0.00327 |
|                      | IL-1 $\beta$  | 15.160            | 0.00002 |
|                      | IL-5          | 0.901             | 0.74880 |
|                      | IL-6          | 5.223             | 0.01186 |
|                      | IL-8          | 2.180             | 0.03982 |
|                      | MCP-1         | 2.586             | 0.00095 |
|                      | MIP-1 $\beta$ | 206.807           | 0.00000 |
|                      | VEGF-A        | 5.357             | 0.02731 |
|                      | IL-4          | 1.627             | 0.00011 |
|                      | IL-10         | 0.081             | 0.03437 |
| Vaginal (uninfected) | GM-CSF        | 4.555             | 0.00312 |
|                      | IFN- $\gamma$ | 8.318             | 0.00127 |
|                      | IL-2          | 3.721             | 0.00004 |
|                      | IL-15         | 0.826             | 0.42756 |
|                      | IL-17         | 6.641             | 0.00197 |
|                      | IL-1ra        | 24.874            | 0.00044 |
|                      | IL-1 $\beta$  | 8.119             | 0.00099 |
|                      | IL-5          | 0.897             | 0.84656 |
|                      | IL-6          | 3.033             | 0.00788 |
|                      | IL-8          | 0.672             | 0.16355 |
|                      | MCP-1         | 1.205             | 0.20324 |
|                      | MIP-1 $\beta$ | 205.749           | 0.00001 |
|                      | VEGF-A        | 58.861            | 0.00012 |
|                      | IL-4          | 1.509             | 0.00213 |
|                      | IL-10         | 0.033             | 0.17892 |

<sup>1</sup>Significantly modulated genes as determined by unpaired *t* test with a Benjemini-Hochberg multiple testing correction ( $P < 0.05$ )

FC: Fold change
