# Supplementary material for: Mucosal Responses to Zika Virus Infection in Cynomolgus Macaques
Source: MDPI journal article supplement (doi:10.3390/pathogens11091033), 2022-09-12
Supplement: s1 [file s1]

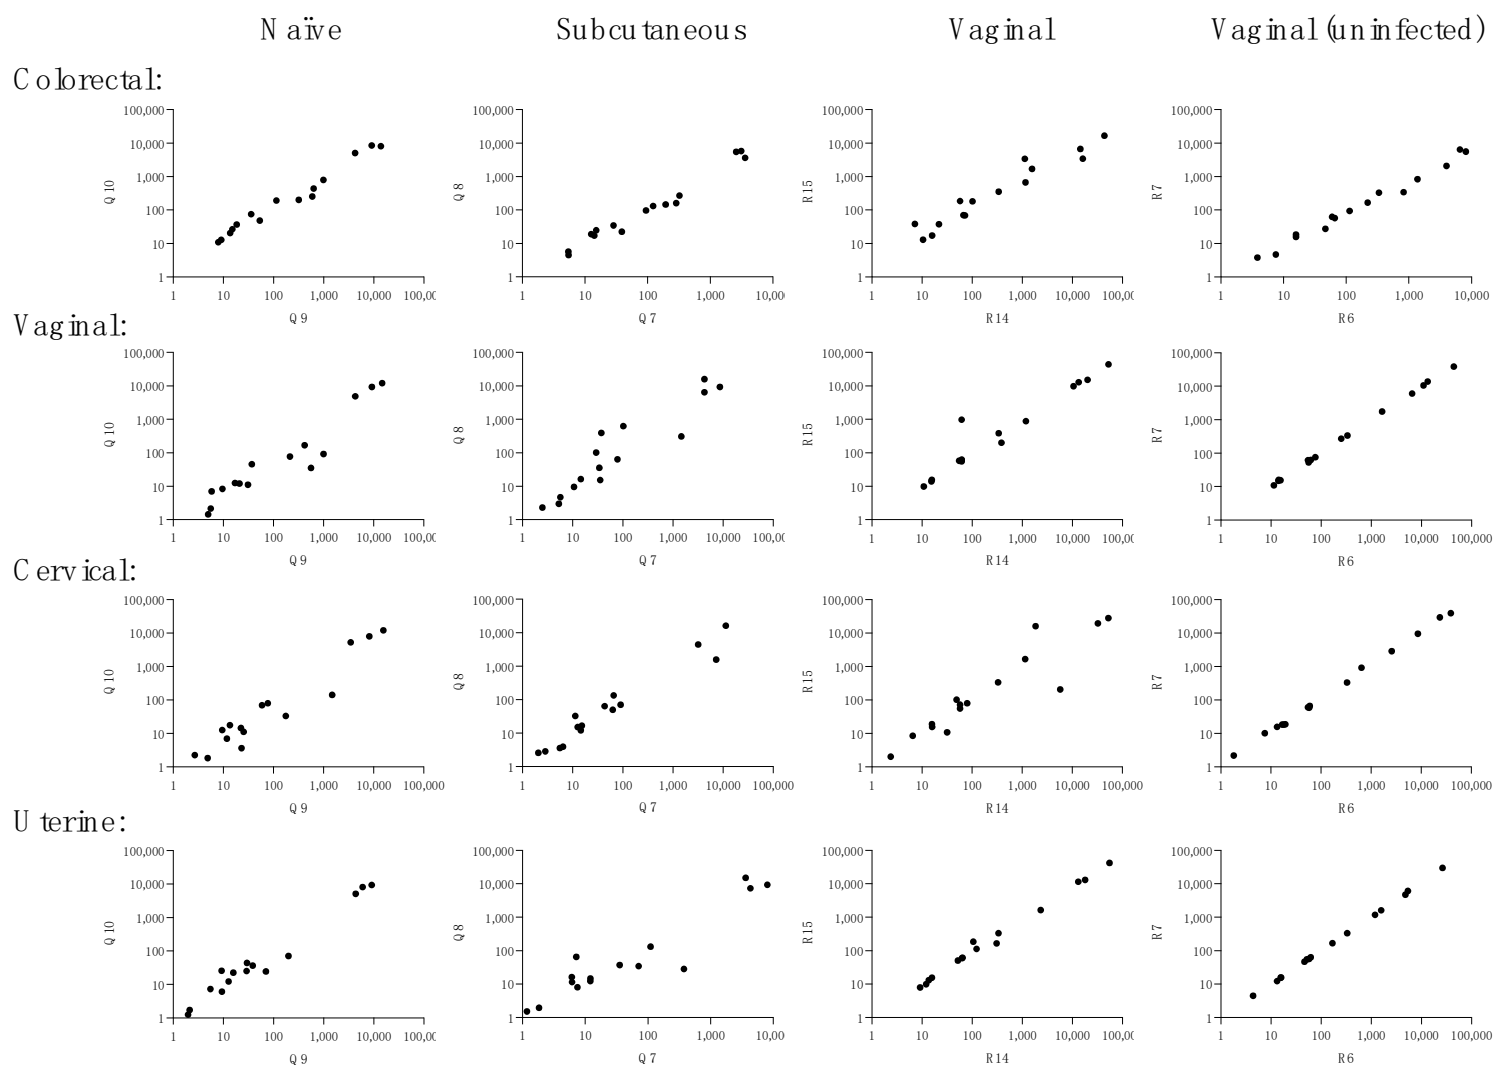

**Figure S1.** Interindividual variability of proteomic responses to ZIKV challenge per study group. Spearman correlation was performed between cytokine concentrations from each macaque within each group (naïve: Q10 and Q9; subcutaneous ZIKV challenge: Q8 and Q7; vaginal ZIKV challenge: R15 and R14; uninfected following vaginal ZIKV challenge: R7 and R6) measured in culture supernatants from colorectal, vaginal, cervical and uterine tissue explants.
