# Supplementary material for: Mucosal Responses to Zika Virus Infection in Cynomolgus Macaques
Source: MDPI journal article supplement (doi:10.3390/pathogens11091033), 2022-09-12
Supplement: s1 [file s1]

**Table S3.** Mucosal cytokine responses to *ex vivo* ZIKV exposure<sup>1</sup>.

Tissue: Colorectal

| ZIKV challenge | Cytokine      | Virus vs. Ctrl FC | <i>P</i> value |
|----------------|---------------|-------------------|----------------|
| <i>Ex vivo</i> | GM-CSF        | 0.820             | 0.76416        |
|                | IFN- $\gamma$ | 0.837             | 0.71531        |
|                | IL-2          | 0.982             | 0.94168        |
|                | IL-15         | 0.876             | 0.72006        |
|                | IL-17         | 0.804             | 0.41496        |
|                | IL-1ra        | 0.643             | 0.27233        |
|                | IL-1 $\beta$  | 0.608             | 0.14489        |
|                | IL-5          | 1.324             | 0.60781        |
|                | IL-6          | 0.756             | 0.04693        |
|                | IL-8          | 0.603             | 0.32395        |
|                | MCP-1         | 0.974             | 0.89240        |
|                | MIP-1 $\beta$ | 0.824             | 0.56254        |
|                | VEGF-A        | 0.414             | 0.03758        |
|                | IL-4          | 0.961             | 0.89567        |
|                | IL-10         | 0.760             | 0.40044        |

Tissue: Vaginal

| ZIKV challenge | Cytokine      | Virus vs. Ctrl FC | <i>P</i> value |
|----------------|---------------|-------------------|----------------|
| <i>Ex vivo</i> | GM-CSF        | 1.170             | 0.75227        |
|                | IFN- $\gamma$ | 2.546             | 0.00632        |
|                | IL-2          | 1.692             | 0.04996        |
|                | IL-15         | 0.830             | 0.59347        |
|                | IL-17         | 1.649             | 0.28001        |
|                | IL-1ra        | 3.138             | 0.12412        |
|                | IL-1 $\beta$  | 2.737             | 0.06652        |
|                | IL-5          | 1.205             | 0.17038        |
|                | IL-6          | 1.393             | 0.00870        |
|                | IL-8          | 1.004             | 0.98059        |
|                | MCP-1         | 1.550             | 0.02296        |
|                | MIP-1 $\beta$ | 4.227             | 0.02777        |
|                | VEGF-A        | 1.715             | 0.50341        |
|                | IL-4          | 1.041             | 0.73553        |
|                | IL-10         | 0.479             | 0.34512        |

Tissue: Cervical

| ZIKV challenge | Cytokine      | Virus vs. Ctrl FC | <i>P</i> value |
|----------------|---------------|-------------------|----------------|
| <i>Ex vivo</i> | GM-CSF        | 0.464             | 0.53845        |
|                | IFN- $\gamma$ | 1.678             | 0.07817        |
|                | IL-2          | 0.843             | 0.75787        |
|                | IL-15         | 1.224             | 0.64206        |
|                | IL-17         | 1.285             | 0.11380        |
|                | IL-1ra        | 0.753             | 0.82172        |
|                | IL-1 $\beta$  | 0.814             | 0.55495        |
|                | IL-5          | 1.255             | 0.70250        |
|                | IL-6          | 0.676             | 0.58385        |
|                | IL-8          | 0.956             | 0.81782        |
|                | MCP-1         | 0.644             | 0.60743        |
|                | MIP-1 $\beta$ | 1.372             | 0.65542        |
|                | VEGF-A        | 3.412             | 0.51916        |
|                | IL-4          | 1.158             | 0.64969        |
|                | IL-10         | 1.245             | 0.09749        |

Tissue: Uterine

| ZIKV challenge | Cytokine      | Virus vs. Ctrl FC | P value |
|----------------|---------------|-------------------|---------|
| <i>Ex vivo</i> | GM-CSF        | 0.955             | 0.89270 |
|                | IFN- $\gamma$ | 1.036             | 0.88357 |
|                | IL-2          | 1.059             | 0.51401 |
|                | IL-15         | 1.455             | 0.31415 |
|                | IL-17         | 0.924             | 0.71360 |
|                | IL-1ra        | 1.392             | 0.50365 |
|                | IL-1 $\beta$  | 1.082             | 0.75657 |
|                | IL-5          | 1.069             | 0.94495 |
|                | IL-6          | 0.970             | 0.26880 |
|                | IL-8          | 1.011             | 0.98450 |
|                | MCP-1         | 0.995             | 0.96617 |
|                | MIP-1 $\beta$ | 0.879             | 0.68666 |
|                | VEGF-A        | 0.916             | 0.38754 |
|                | IL-4          | 0.918             | 0.12716 |
|                | IL-10         | 0.583             | 0.47974 |

<sup>1</sup>Significantly modulated genes as determined by unpaired *t* test with a Benjemini-Hochberg multiple testing correction ( $P < 0.05$ )

FC: Fold change
