# Supplementary material for: Mucosal Responses to Zika Virus Infection in Cynomolgus Macaques
Source: MDPI journal article supplement (doi:10.3390/pathogens11091033), 2022-09-12
Supplement: s1 [file s1]

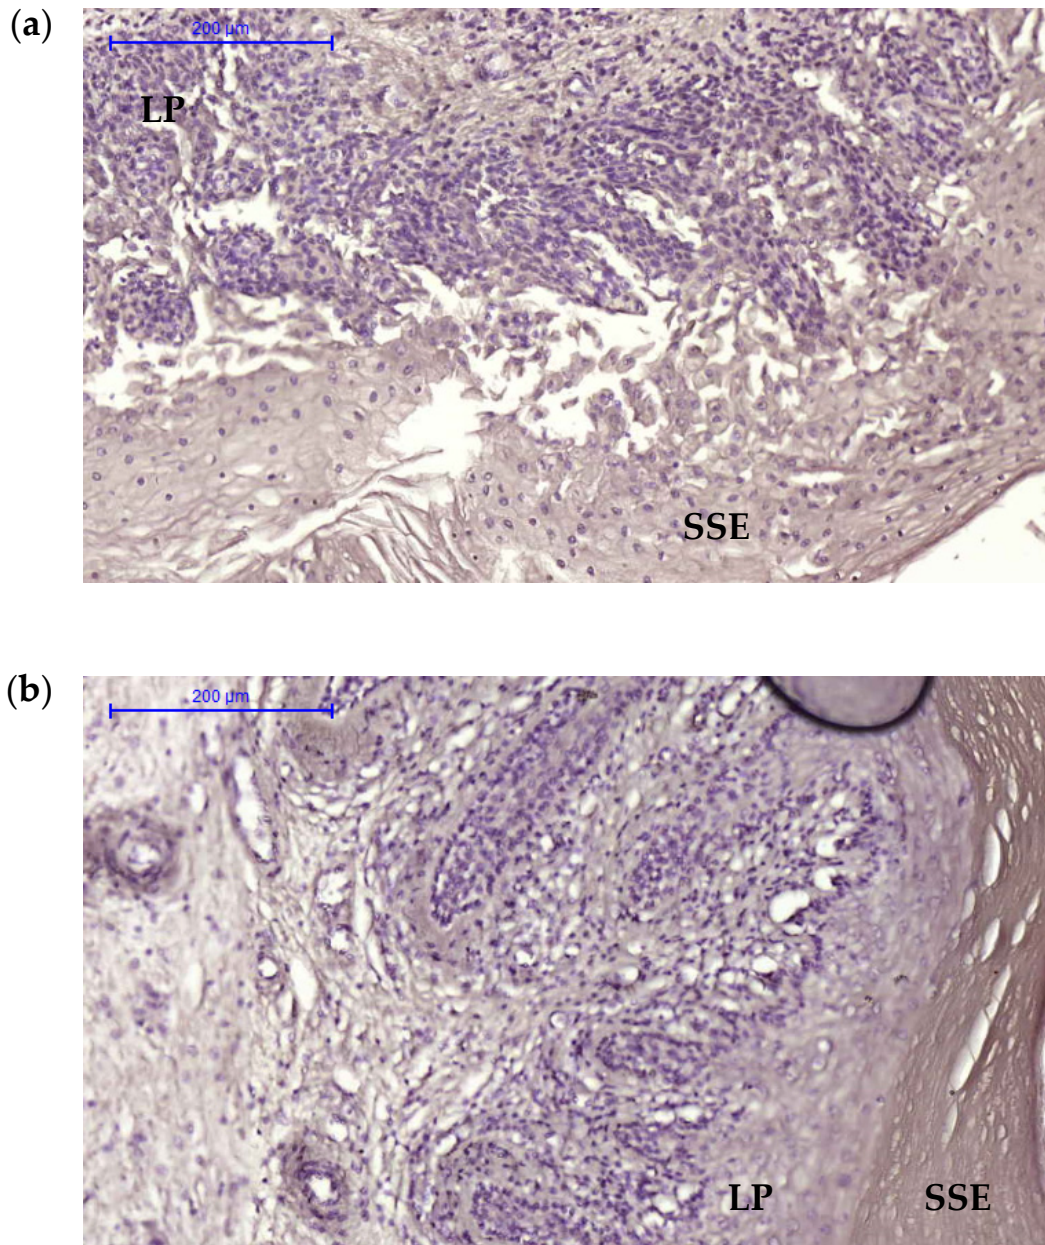

**Figure S2.** RNAscope In Situ Hybridization negative controls. Vaginal explants were cultured for 1 day either (a) unchallenged or (b) exposed to  $10^5$  pfu of ZIKV PRABC59 for 2 h. Representative images of sections processed for RNAscope analysis in (a) the presence or (b) absence of probe but with nuclei stained with haematoxylin (blue). Blue bar = 200 µm. SSE: stratified squamous epithelium; LP: lamina propria.
