# Supplementary material for: Mucosal Responses to Zika Virus Infection in Cynomolgus Macaques
Source: MDPI journal article supplement (doi:10.3390/pathogens11091033), 2022-09-12
Supplement: s1 [file s1]

**Table S2.** Interindividual variability analysis within study groups<sup>1</sup>.

| Tissue     | ZIKV challenge       | rs     | P value |
|------------|----------------------|--------|---------|
| Colorectal | Naïve                | 0.9929 | <0.0001 |
|            | Subcutaneous         | 0.9714 | <0.0001 |
|            | Vaginal              | 0.9393 | <0.0001 |
|            | Vaginal (uninfected) | 0.9929 | <0.0001 |
| Vaginal    | Naïve                | 0.9571 | <0.0001 |
|            | Subcutaneous         | 0.9393 | <0.0001 |
|            | Vaginal              | 0.9107 | <0.0001 |
|            | Vaginal (uninfected) | 0.9929 | <0.0001 |
| Cervical   | Naïve                | 0.9071 | <0.0001 |
|            | Subcutaneous         | 0.9643 | <0.0001 |
|            | Vaginal              | 0.9429 | <0.0001 |
|            | Vaginal (uninfected) | 0.9929 | <0.0001 |
| Uterine    | Naïve                | 0.9071 | <0.0001 |
|            | Subcutaneous         | 0.8321 | 0.0002  |
|            | Vaginal              | 0.9893 | <0.0001 |
|            | Vaginal (uninfected) | 0.9893 | <0.0001 |

<sup>1</sup>Spearman correlations between cytokine levels from macaques of each group; rs: Spearman correlation coefficient; P value determined using a two-tailed unpaired Student's *t* test.
